# Supplementary material
Source: PubMed Central journal article supplement (PMC8190653)
Supplement: NIHMS1608639-supplement-supp_figures.pdf [file NIHMS1608639-supplement-supp_figures.pdf]

# Sup Fig 1

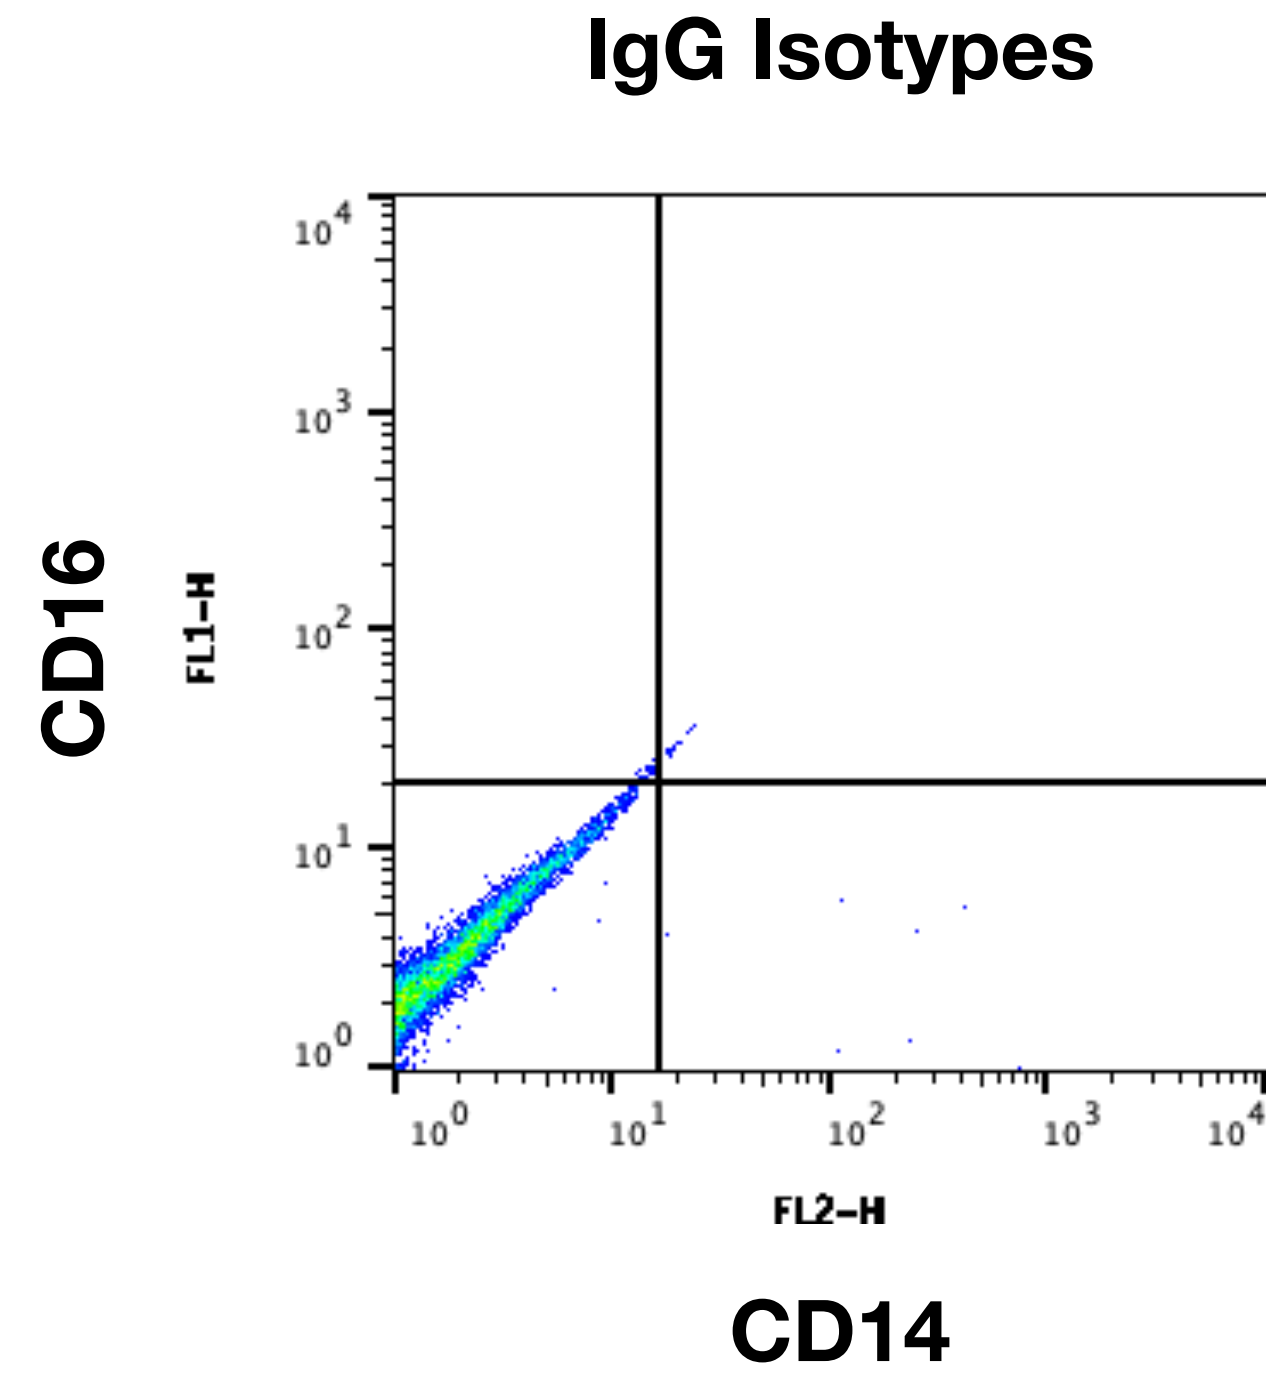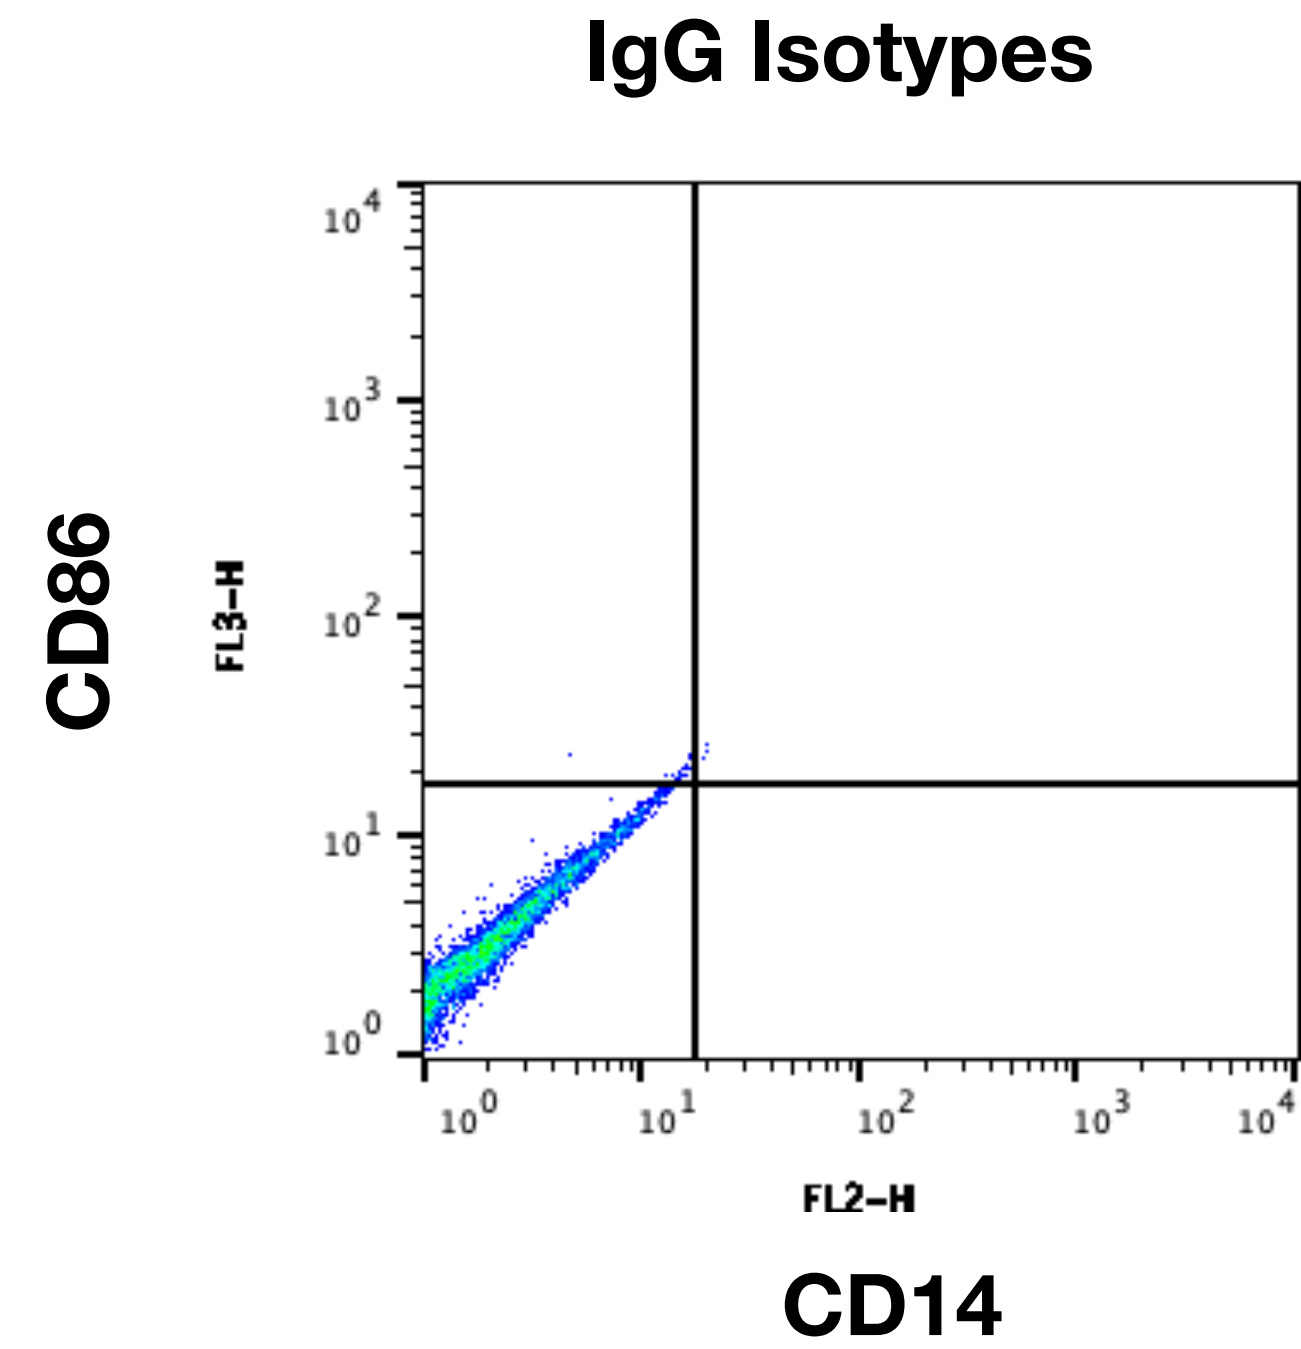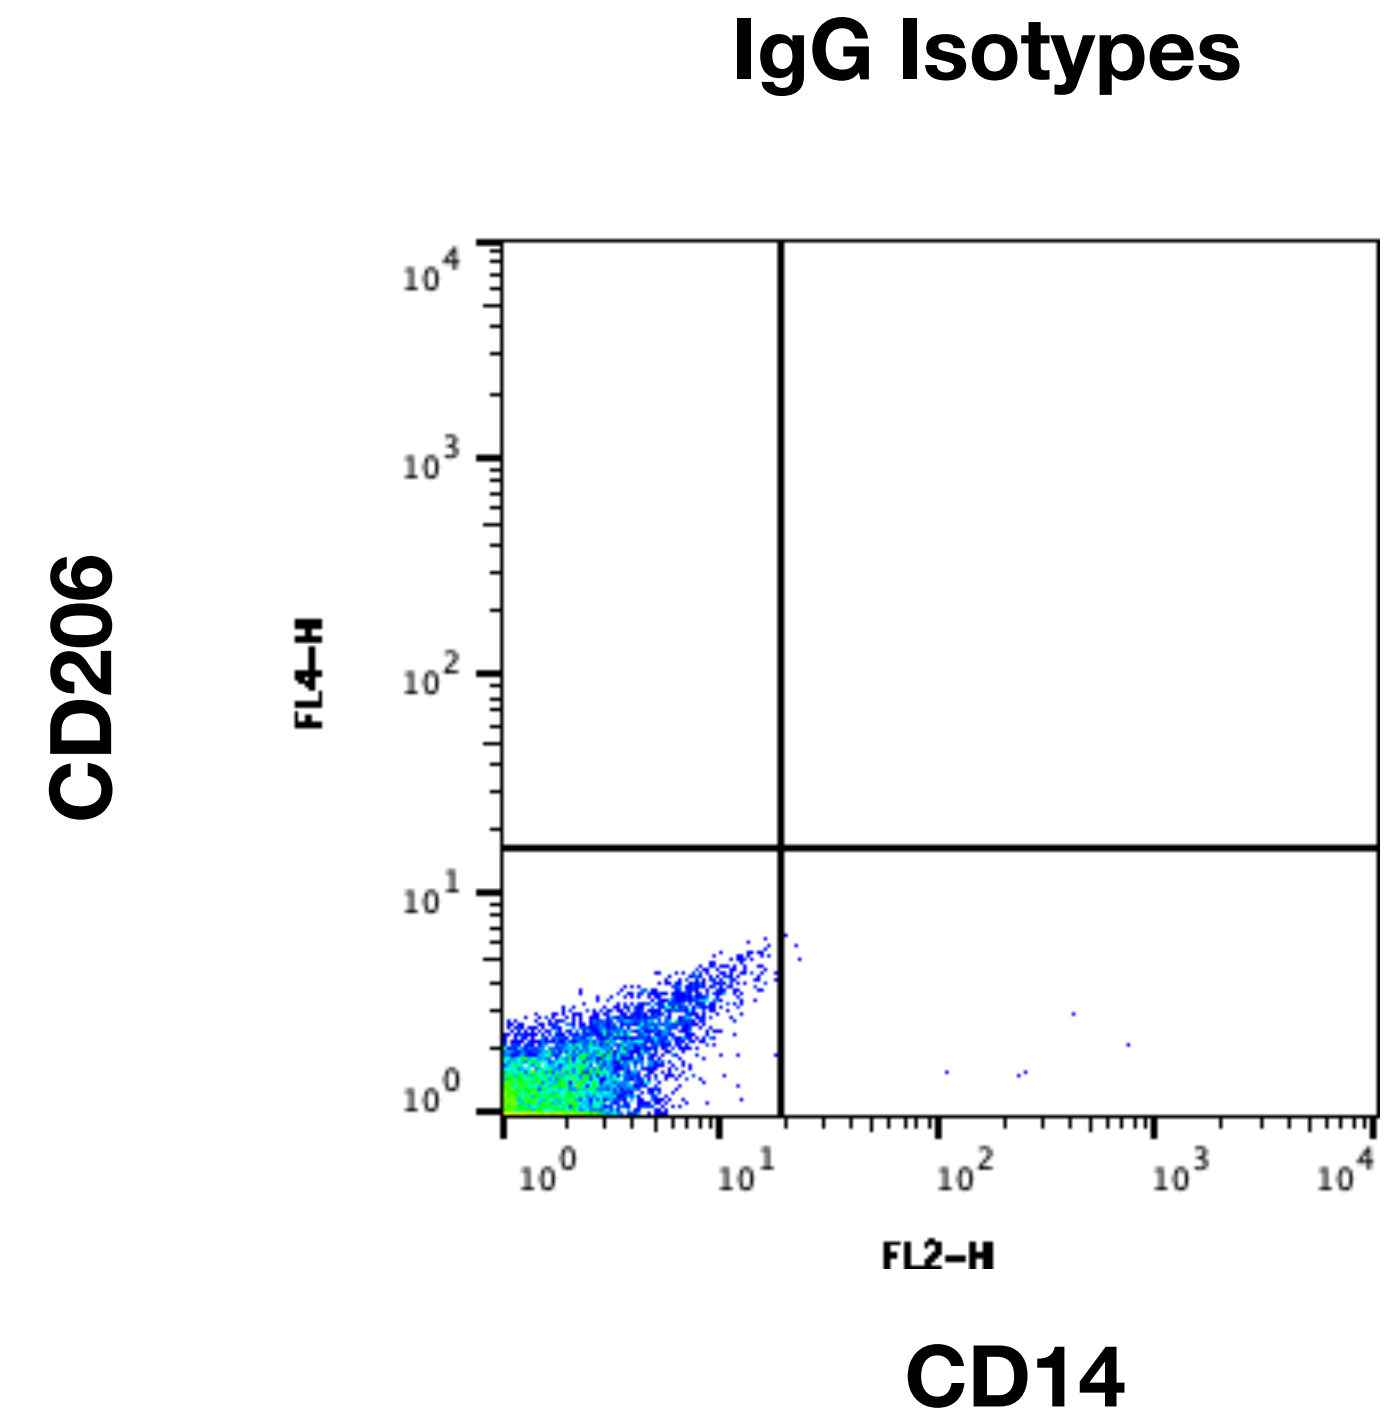

**Sup. Fig. 1.** Flow Cytometry for macrophage differentiation markers. Isotype antibodies used for each marker.

# Sup Fig 2

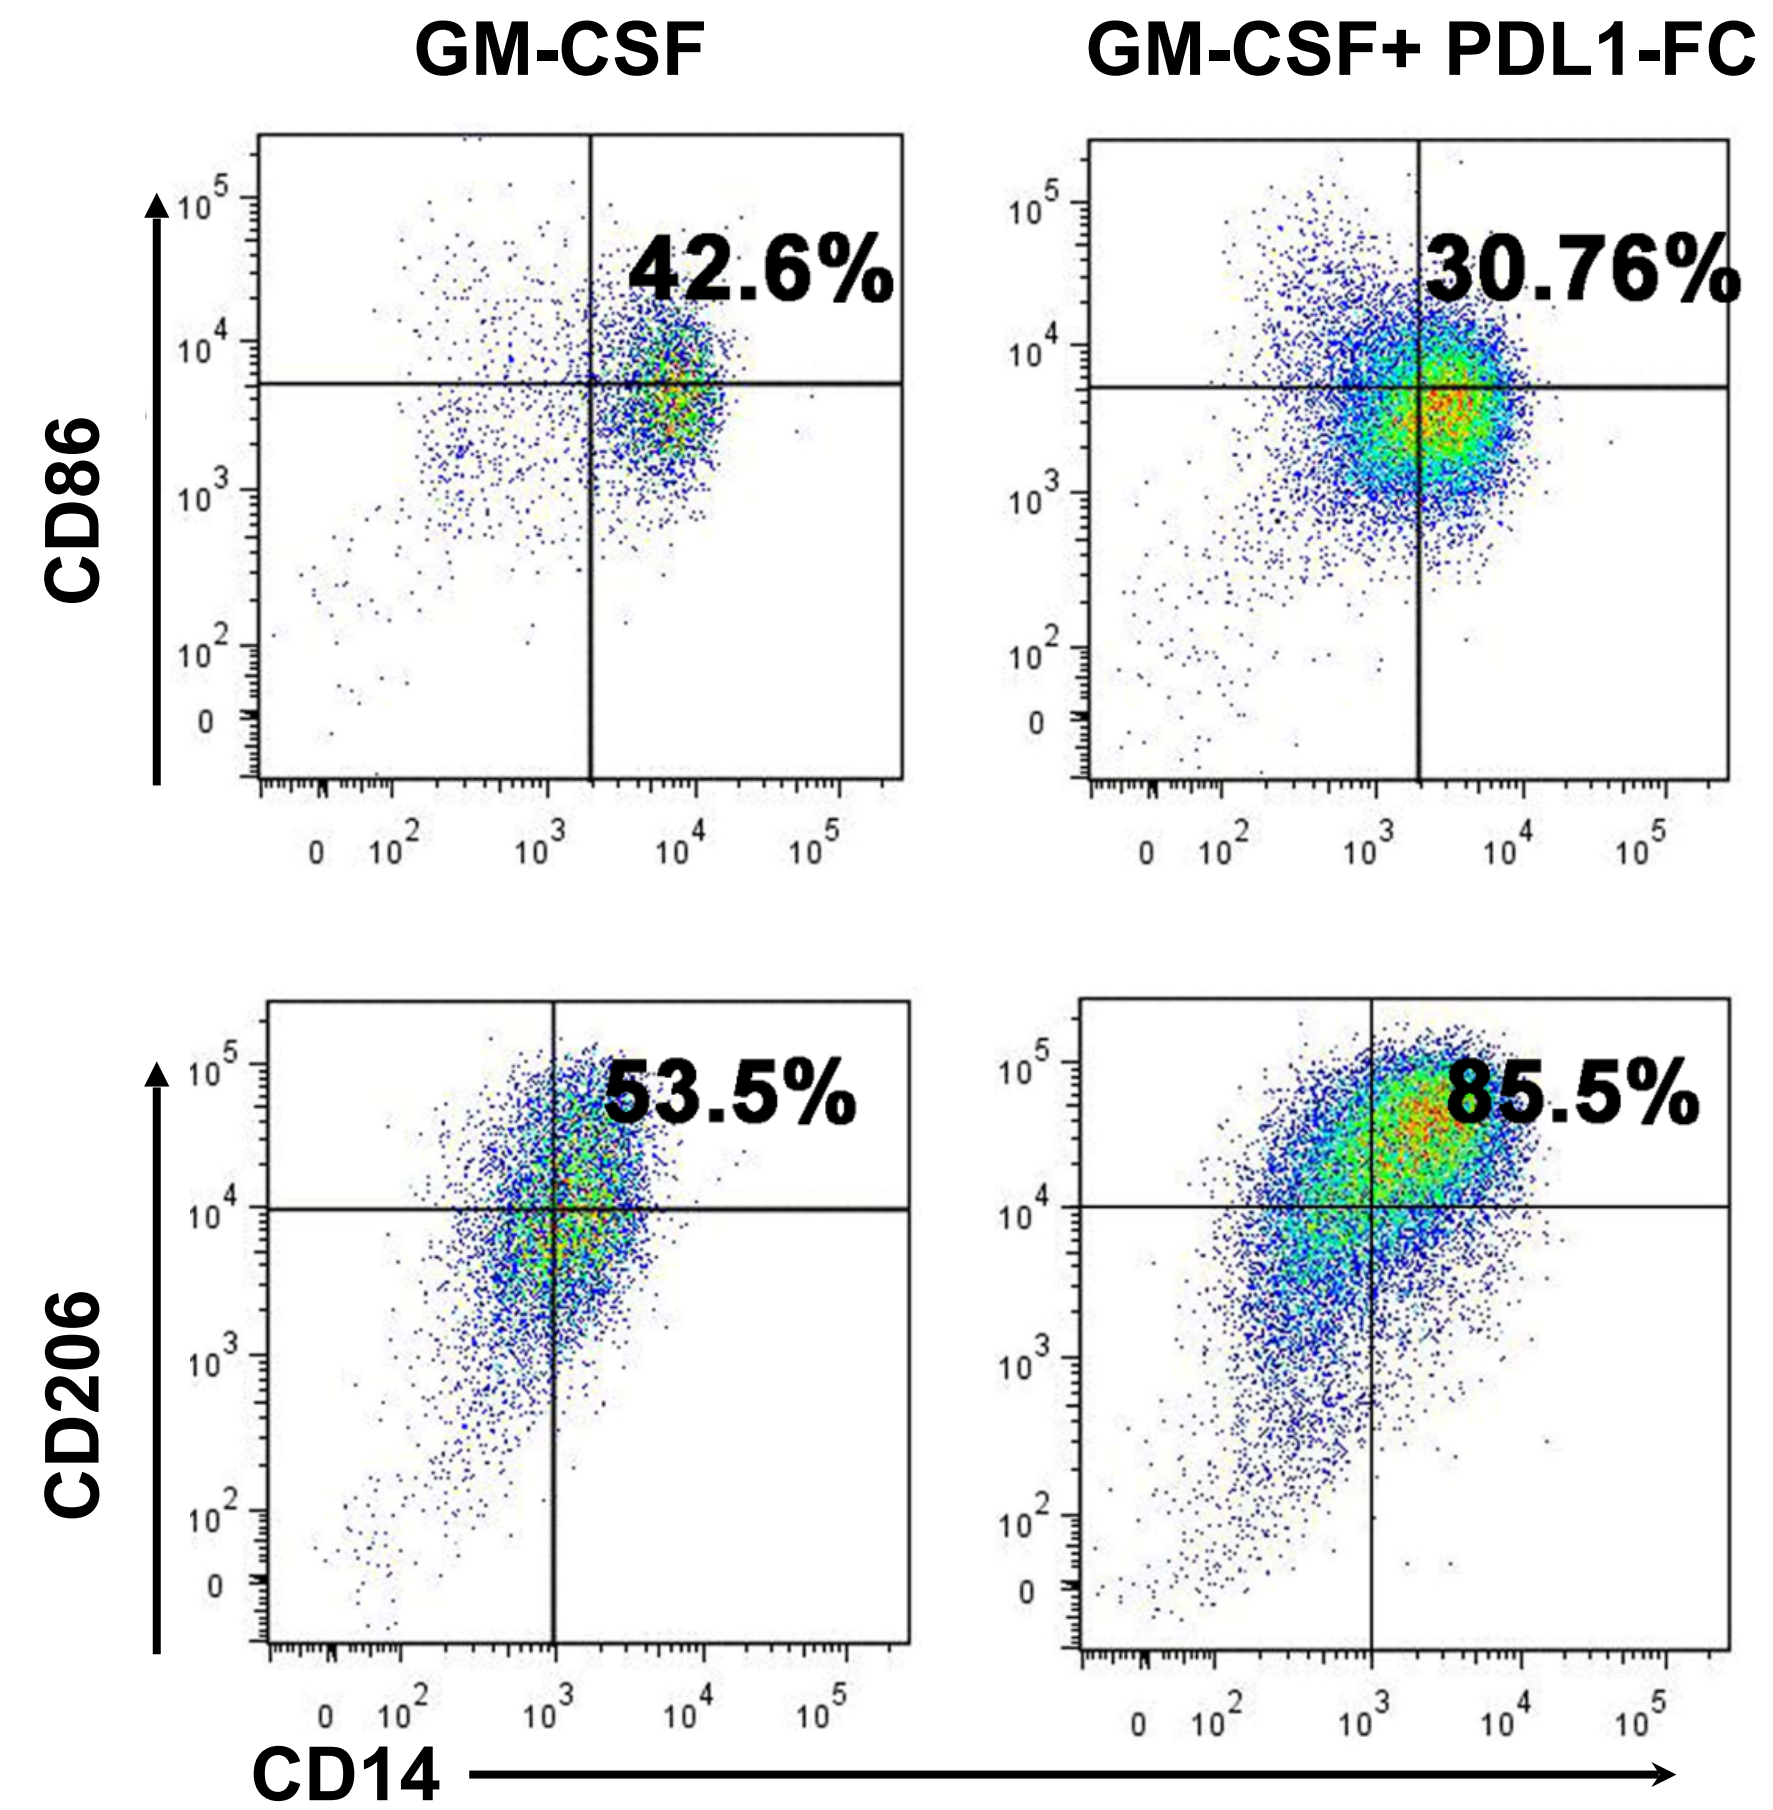

**Sup. Fig. 2.** Effect of stimulating the PD-1 signaling pathway in GM-CSF M1 differentiated macrophages. Peripheral CD14<sup>+</sup> macrophages were differentiated with GM-CSF in the presence or absence of the recombinant PD-L1 agonist (PD-L1-FC) and their phenotype evaluated by Flow Cytometry.

# Sup Fig 3

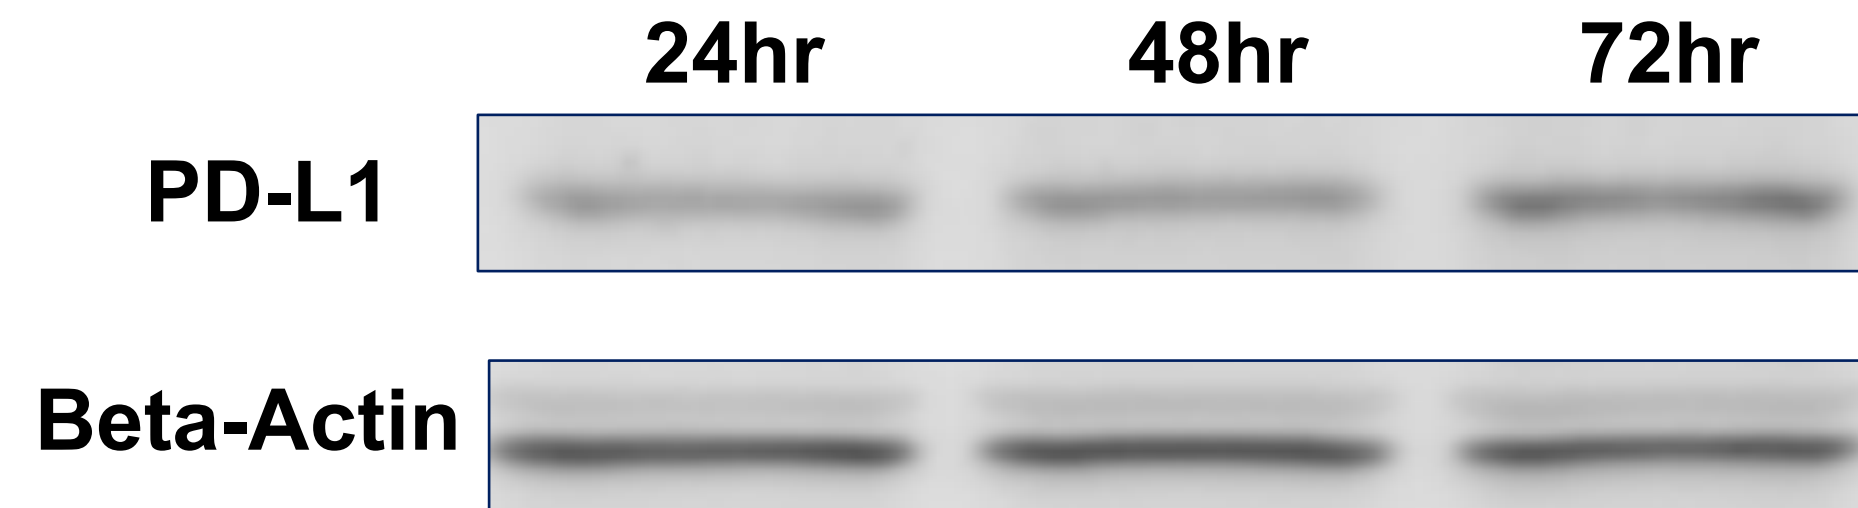

**Sup. Fig. 3.** Expression of PD-L1 in first trimester trophoblast Swan 71 cell line. Cell lysate was prepared from trophoblast Swan 71 cells every 24h and PD-L1 protein expression determined by western blot analysis. Beta Actin was housed as housekeeping gene.

# Sup Fig 4

## A

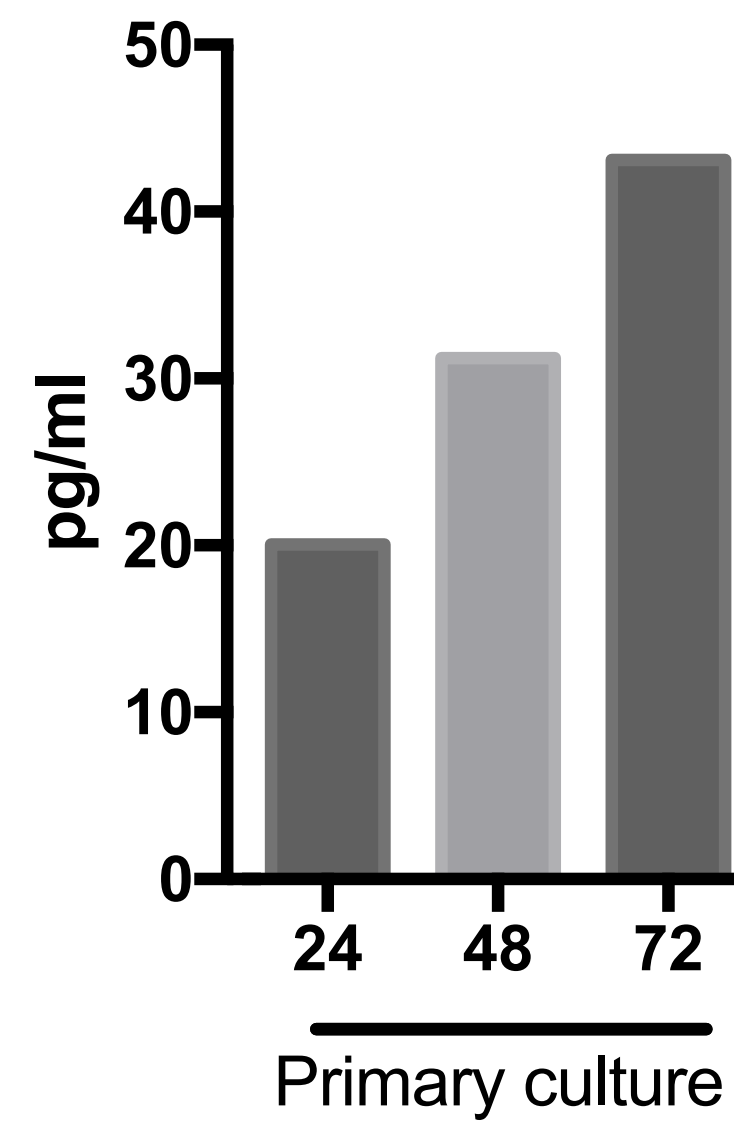

## B

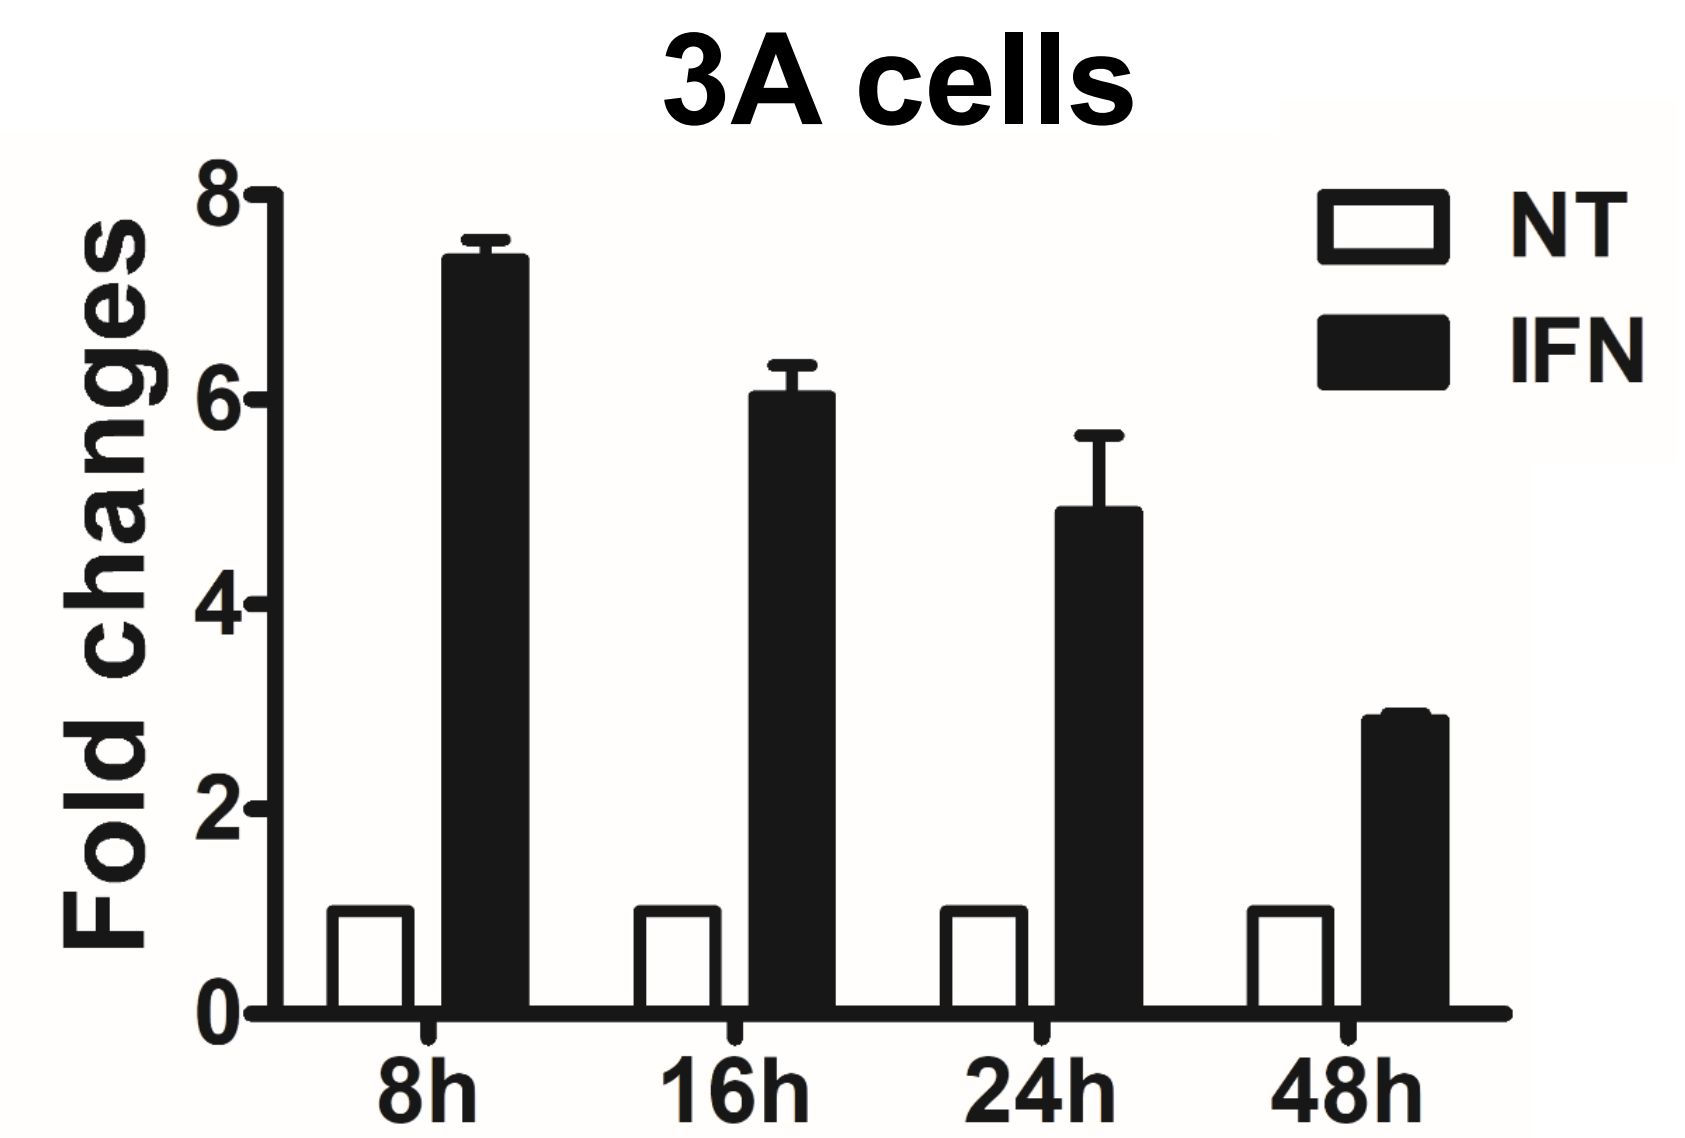

## C

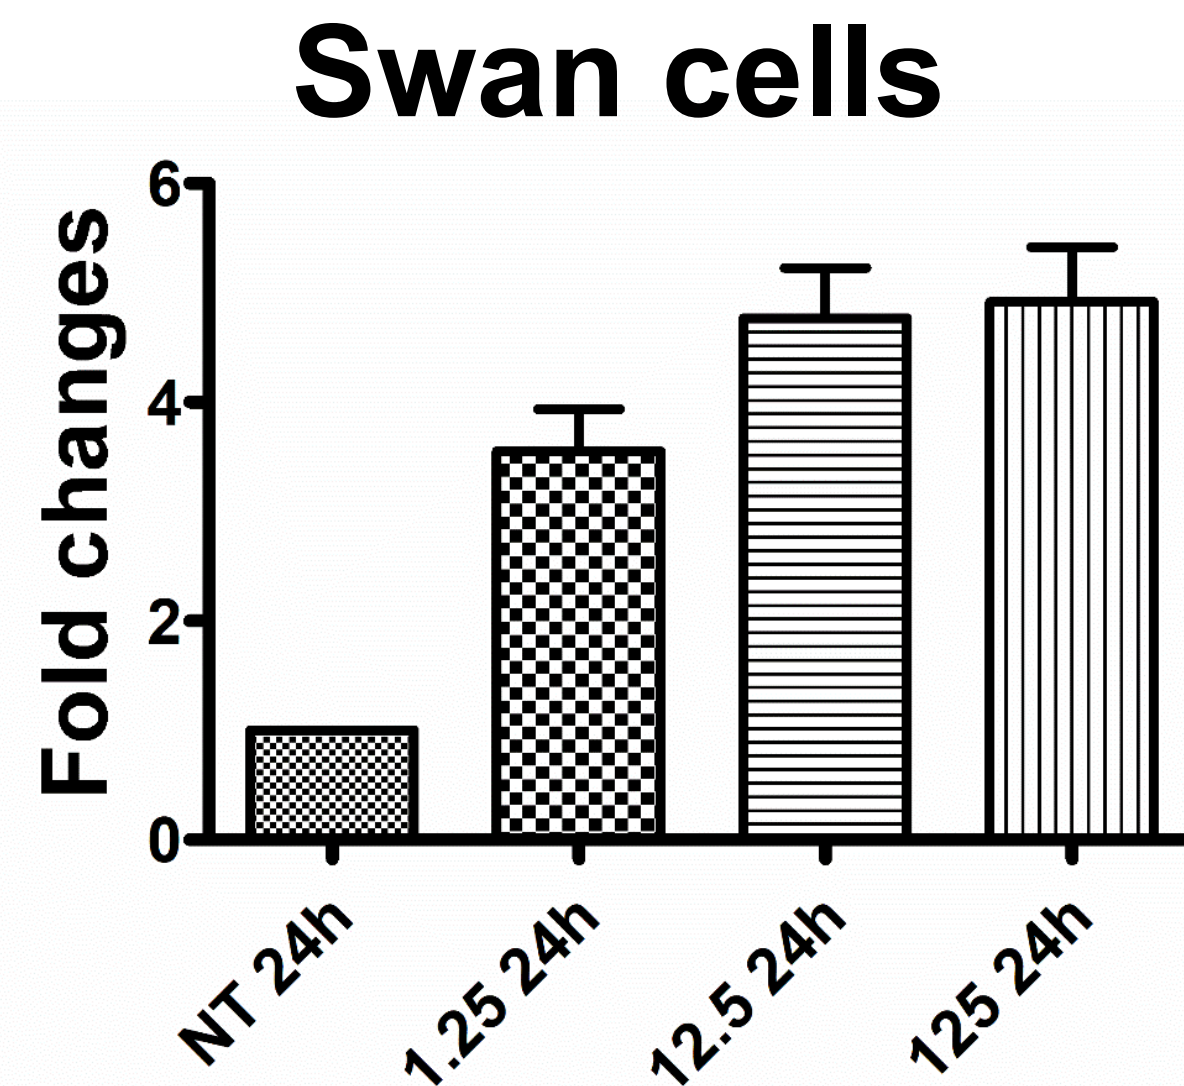

## D

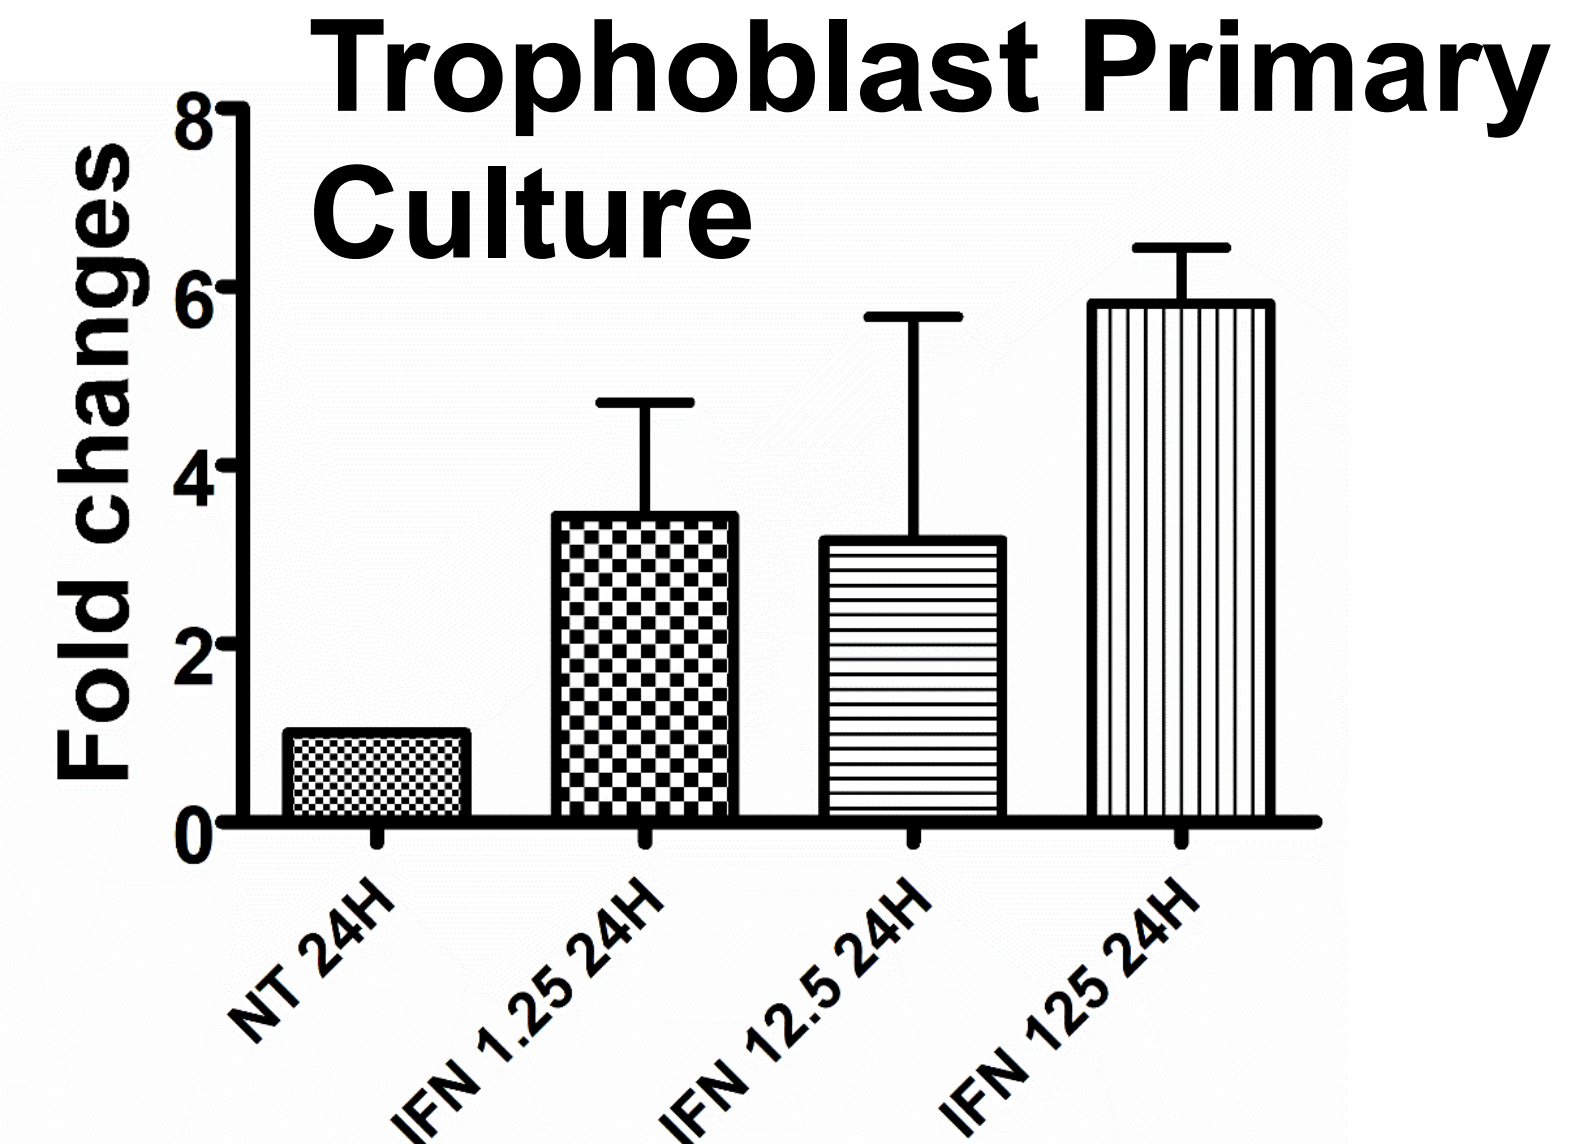

**Sup. Fig. 4. Expression and secretion of PDL-1 by first trimester trophoblast cells.** Trophoblast cells were isolated from first trimester placentas obtained from elective terminations.

**A.** Supernatants from the primary cultures were collected at different times and evaluated for the expression of sPDL-1 (n=6 preparations).

**B.** Effect of IFN on PDL-1 mRNA expression in first trimester trophoblast cell lines 3A. 3A cells were treated with IFN (12.5 IU/ml) and PD-L1 mRNA expression was determined by qPCR. Data is presented as fold changes from the control group treated with vehicle (NT).

**C.** Effect of IFN on PDL-1 mRNA expression in first trimester trophoblast cell Swan 71 cells. Time dependent induction of PDL-1 mRNA expression by trophoblast cells incubated in the presence of increasing concentrations of IFN. n=3 independent experiments

**D.** Effect of IFN on PDL-1 mRNA expression in primary cultures of first trimester trophoblast cells. Time dependent induction of PDL-1 mRNA expression by trophoblast cells incubated in the presence of increasing concentrations of IFN. n=6 independent preparations
